# Supplementary material
Source: Elsevier journal article supplement (https://www.sciencedirect.com/science/article/pii/S0211699521001594)
Supplement: mmc1 [file S0211699521001594:mmc1.docx]

**Tabla suplementaria 1: Características de la población con ERC estadio 1, 2 vs 3, 4, 5.**

|  | | Estadio ERC | | | | | |  |
| --- | --- | --- | --- | --- | --- | --- | --- | --- |
|  | | 1, 2 n (%) | | | 3, 4, 5 n (%) | | P | |
| Sexo | Femenino | | 708 (45,9%) | 1.943 (47,2%) | | 0,377 | | |
| Masculino | | 836 (54,1%) | 2.176 (52,8%) | |
| Edad | Menor 65 | | 1.166 (75,5%) | 1.291 (31,3%) | | <0,001 | | |
| 65 y más | | 378 (24,5%) | 2.828 (68,7%) | |
| DM |  | | 532 (34,5%) | 1.466 (35,6%) | | 0,426 | | |
| Obesidad |  | | 311 (20,1%) | 468 (11,4%) | | <0,001 | | |
| HTA |  | | 1.324 (85,8%) | 3.896 (94,6%) | | <0,001 | | |
| Dislipidemia |  | | 890 (57,6%) | 2.581 (62,7%) | | 0,001 | | |
| Enfermedad Cardiovasculara |  | | 218 (14,1%) | 1.125 (27,3%) | | <0,001 | | |
| Nefrotóxicos |  | | 166 (10,8%) | 303 (7,4%) | | <0,001 | | |
| Nefroprotectores |  | | 1.082 (70,1%) | 3.032 (73,6%) | | 0,008 | | |
| EPS | PPR | | 1.300 (84%) | 2.902 (70,5%) | | <0,001 | | |
| TC | | 244 (15,8%) | 1.217 (29,5%) | |

aEnfermedad cardiovascular: definido como presencia de Infarto agudo de miocardio,

accidente cerebrovascular o enfermedad coronaria

DMT2: Diabetes mellitus tipo 2, ERC: enfermedad renal crónica, HTA: hipertensión arterial

PPR: programa de protección renal, TC: tratamiento convencional

**Tabla suplementaria 2: Paraclínicos de base en pacientes con y sin DMT2.**

|  | Diabetes mellitus tipo 2 | | | |  |
| --- | --- | --- | --- | --- | --- |
| Sí | | No | |  |
| (n) | Mediana (IQR) | (n) | Mediana (IQR) | (P) |
| Peso | 1.797 | 68 (60-76) | 3.290 | 66 (59-75) | 0,0000 |
| PAS mmHg | 1.799 | 130 (120-140) | 3.296 | 122 (120-140) | 0,0000 |
| PAD mmHg | 1.798 | 80 (70-80) | 3.292 | 80 (70-80) | 0,4588 |
| Glicemia en ayunas mg/dL | 1.351 | 112 (93-142) | 1.609 | 92 (85-100) | 0,0000 |
| HbA1c (%) | 1.101 | 7,1 (6,3-8,5) | 112 | 6,0 (5,6-6,5) | 0,0000 |
| Proteinuria 24h mg/día | 1.167 | 265 (155-696) | 2.006 | 190 (116-640) | 0,0000 |
| Creatinina Sérica (mg/dL) | 1.881 | 1,39 (1,19-1,65) | 3.350 | 1,38 (1,20-1,62) | 0,8950 |
| Colesterol total mg/dL | 1.081 | 192 (164-222) | 1.864 | 197 (169-226) | 0,0013 |
| Trigliceridos mg/L | 1.059 | 170 (123-245) | 1.813 | 154 (112-218) | 0,0000 |
| Colesterol HDL mg/dL | 795 | 41 (35-50) | 1.352 | 43,3 (36-52) | 0,0001 |
| Colesterol LDL mg/dL | 196 | 109 (83-135) | 355 | 117 (93-143 | 0,0095 |
| Hemoglobina gr/dL | 915 | 13 (12-14,3) | 1.654 | 13,7 (12,3-15,0) | 0,0000 |
| Potasio sérico mEq/L | 844 | 4,6 (4,3-5) | 1.537 | 4,4 (4,1-4,8) | 0,0000 |
| Calcio sérico mEq/L | 502 | 9,4 (9-9,8) | 918 | 9,4 (9,0-9,9) | 0,7766 |
| Fosfato sérico mEq/L | 425 | 3,9 (3,5-4,4) | 765 | 3,7 (3,3-4,2) | 0,0000 |
| Albúmina g/L | 583 | 4,0 (3,9-4,3) | 1.073 | 4,10 (3,8-4,4) | 0,0005 |

ERC: enfermedad renal crónica, PAS: presión arterial sistólica, PAD: presión arterial diastólica, HbA1c: hemoglobina glicada. IQR: rango intercuartil

**Tabla suplementaria 3: Modelo de riesgos proporcionales de cox ajustado por covariables sin la interacción estadio ERC-DMT2**

| **Variable** | **HR (IC 95%)** | **P** |
| --- | --- | --- |
| EPS | 1,42 (1,09 - 1,84) | 0,008 |
| Estadio ERC | 2,05 (1,37 - 3,06) | <0,001 |
| Edad | 3,04 (2,21 - 4,19) | <0,001 |
| Sexo | 1,01 (0,81 - 1,27) | 0,897 |
| HTA | 0,54 (0,34 - 0,87) | 0,011 |
| Dislipidemia | 0,37 (0,29 - 0,47) | <0,001 |
| Nefrotóxicos | 0,94 (0,59 - 1,48) | 0,792 |
| Nefroprotectores | 0,71 (0,55 - 0,94) | 0,015 |
| Enfermedad cardiovascular | 1,38 (1,08 - 1,76) | 0,009 |
| DMT2 | 1,61 (1,28 - 2,03) | <0,001 |

DMT2: diabetes mellitus tipo 2. EPS: empresa prestadora de servicios de salud,

ERC: enfermedad renal crónica, HTA: hipertensión arterial

**Tabla suplementaria 4: Modelo de riesgos proporcionales de cox ajustado por covariables con la interacción estadio ERC-DMT2**

| **Variable** | **HR (IC 95%)** | **P** |
| --- | --- | --- |
| EPS | 1,43 (1,10 - 1,86) | 0,007 |
| Estadio ERC | 4,36 (2,09 - 9,10) | <0,001 |
| Edad | 2,89 (2,11 - 3,96) | <0,001 |
| Sexo | 1,01 (0,80 - 1,26) | 0,947 |
| HTA | 0,52 (0,33 - 0,82) | 0,005 |
| Dislipidemia | 0,37 (0,29 - 0,47) | <0,001 |
| Nefrotóxicos | 0,95 (0,60 - 1,50) | 0,834 |
| Nefroprotectores | 0,71 (0,55 - 0,93) | 0,013 |
| Enfermedad cardiovascular | 1,37 (1,08 - 1,74) | 0,010 |
| DMT2 | 4,95 (2,17 - 11,25) | <0,001 |
| Interacción Estadio-DMT2 | 0,29 (0,12 - 0,69) | 0,005 |

DMT2: diabetes mellitus tipo 2. EPS: empresa prestadora de servicios de salud,

ERC: enfermedad renal crónica, HTA: hipertensión arterial
